# Supplementary material for: A Quantitative Comparison of the Similarity between Genes and Geography in Worldwide Human Populations
Source: PLoS Genet. 2012 Aug 23;8(8):e1002886. doi: 10.1371/journal.pgen.1002886 (PMC3426559; doi:10.1371/journal.pgen.1002886)
Supplement: Figure S2 — Procrustes analysis of genetic and geographic coordinates of Sub-Saharan African populations, excluding Maasai (MKK) as well as Mbororo Fulani and four hunter-gatherer populations. (A) Geographic coordinates of 22 populations. (B) Procrustes-transformed PCA plot of genetic variation. The Procrustes analysis is based on the unprojected latitude-longitude coordinates and PC1-PC2 coordinates of 318 individuals. PC1 and PC2 are indicated by dotted lines, crossing over the centroid of all individuals. PC1 and PC2 account for 0.89% and 0.75% of the total variance, respectively. The Procrustes similarity statistic is (). The rotation angle of the PCA map is . (PDF) [file pgen.1002886.s002.pdf]

**A**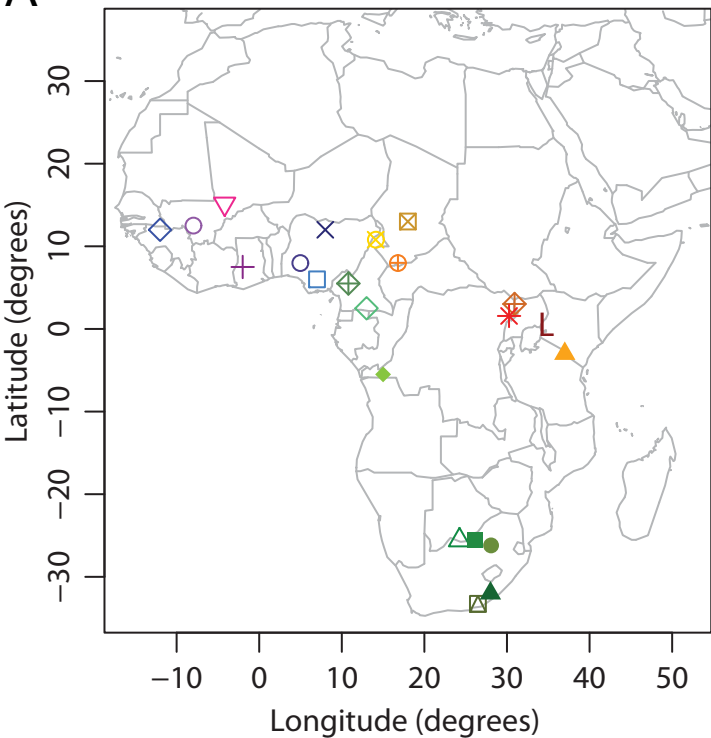

- |                 |                     |         |
|-----------------|---------------------|---------|
| ◇ Alur          | △ Bantu (S. Africa) | ◇ Fang  |
| ○ Bambaran      | + Brong             | × Hausa |
| ◇ Bamoun        | □ Bulala            | * Hema  |
| △ Bantu (Kenya) | ▽ Dogon             | □ Igbo  |

**B**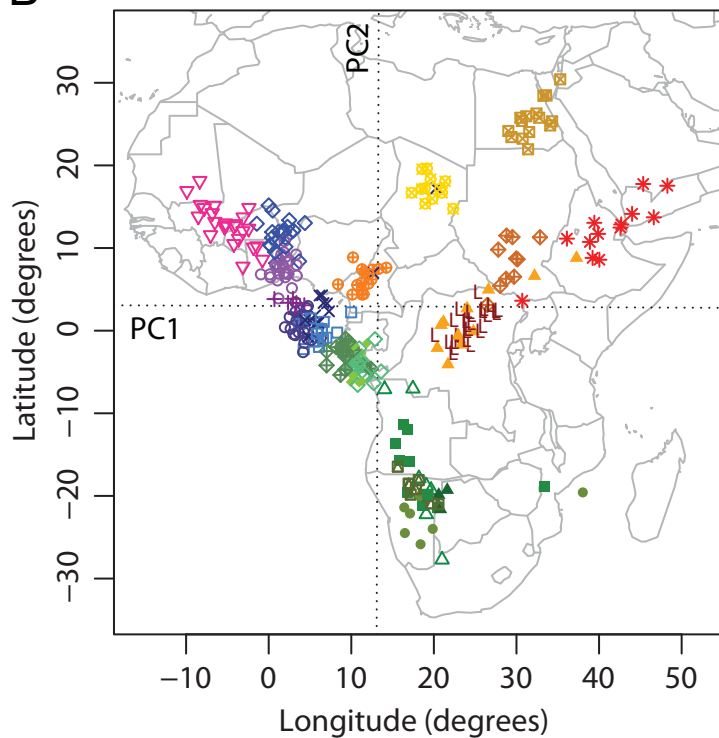

- |               |                |          |
|---------------|----------------|----------|
| ⊕ Kaba        | ◇ Mandenka     | ▲ Xhosa  |
| ◇ Kongo       | ◇ Nguni        | ○ Yoruba |
| L Luhya (LWK) | ■ Pedi         |          |
| ⊗ Mada        | ● Sotho/Tswana |          |
