# Supplementary material for: A Quantitative Comparison of the Similarity between Genes and Geography in Worldwide Human Populations
Source: PubMed Central journal article supplement (PMC3426559; doi:10.1371/journal.pgen.1002886), 2012-08-23

A

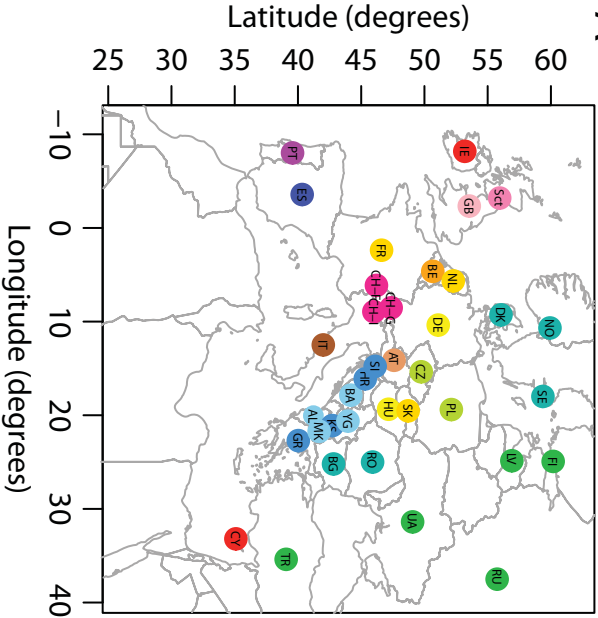

B

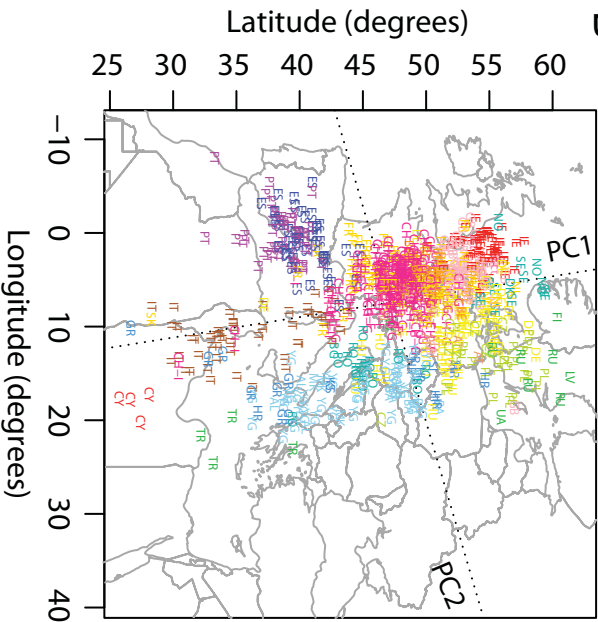

Supplement: pgen.1002886.s001.pdf [file pgen.1002886.s001.pdf]
