# Supplementary material for: A Quantitative Comparison of the Similarity between Genes and Geography in Worldwide Human Populations
Source: PubMed Central journal article supplement (PMC3426559; doi:10.1371/journal.pgen.1002886), 2012-08-23
Supplement: pgen.1002886.s005.pdf [file pgen.1002886.s005.pdf]

A

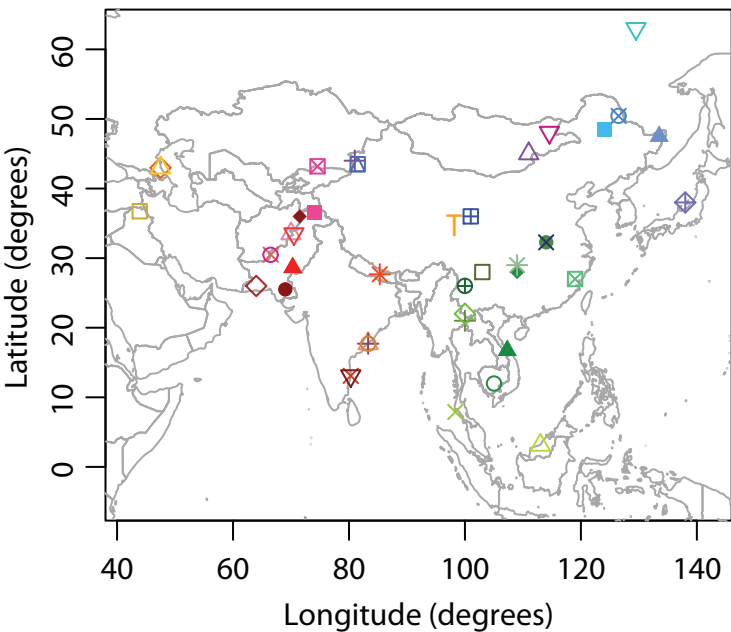

- |                |                  |               |
|----------------|------------------|---------------|
| △ A.P. Brahmin | ○ Cambodian      | △ Iban        |
| + A.P. Madiga  | + Dai            | □ Iraqi Kurd  |
| ○ A.P. Mala    | ■ Daur           | ◇ Japanese    |
| × Balochi      | ● Han            | ◆ Kalash      |
| ○ Brahui       | × Han (N. China) | ⊠ Kyrgyzstani |
| ■ Burusho      | △ Hazara         | ◇ Lahu        |
| ▽ Buryat       | ▲ Hezhen         | ◇ Makrani     |

B

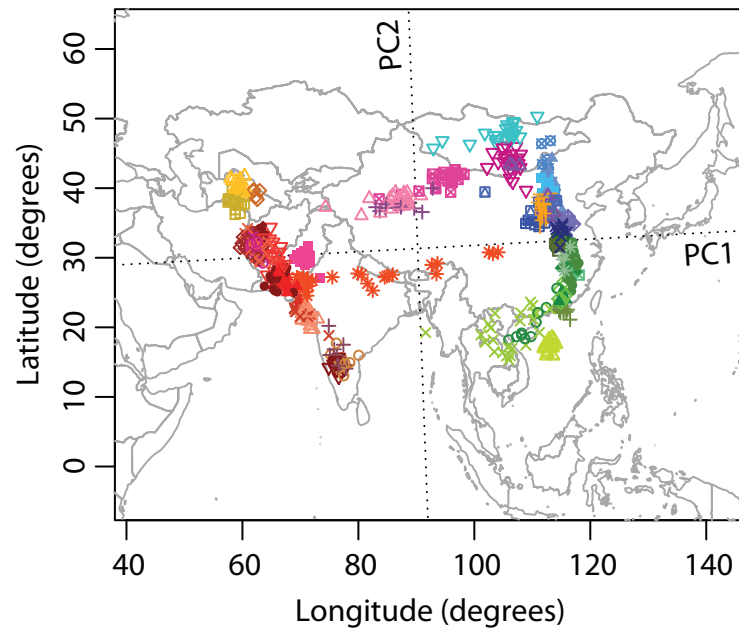

- |             |                |              |
|-------------|----------------|--------------|
| ◆ Miao      | ⊠ She          | ⊠ Tu         |
| △ Mongola   | ● Sindhi       | * Tujia      |
| ⊕ Naxi      | ◇ Stalskoe     | △ Urkarah    |
| * Nepalese  | × T.N. Brahmin | + Uygur      |
| × Oroqen    | ▽ T.N. Dalit   | ▲ Vietnamese |
| ▲ Pakistani | × Thai         | ⊠ Xibo       |
| ▽ Pathan    | T Tibetan      | ▽ Yakut      |
|             |                | □ Yi         |
