# Supplementary material for: A Quantitative Comparison of the Similarity between Genes and Geography in Worldwide Human Populations
Source: PubMed Central journal article supplement (PMC3426559; doi:10.1371/journal.pgen.1002886), 2012-08-23
Supplement: pgen.1002886.s010.pdf [file pgen.1002886.s010.pdf]

| Population        | Latitude (degrees) | Longitude (degrees) | Source of coordinates | Sample size | High-missing-data samples | Genotyping platform | Source of SNP data | Datasets in which the population is included |        |        |      |         |           |
|-------------------|--------------------|---------------------|-----------------------|-------------|---------------------------|---------------------|--------------------|----------------------------------------------|--------|--------|------|---------|-----------|
|                   |                    |                     |                       |             |                           |                     |                    | World                                        | Europe | Africa | Asia | E. Asia | C.S. Asia |
| Adygei            | 44                 | 39                  | [45]                  | 17          | 0                         | Illumina 650K       | [31]               | X                                            |        |        | X    |         |           |
| Balochi           | 30.5               | 66.5                | [45]                  | 24          | 0                         | Illumina 650K       | [31]               | X                                            |        | X      |      |         |           |
| Bantu (Kenya)     | -3                 | 37                  | [45]                  | 11          | 0                         | Illumina 650K       | [31]               | X                                            |        | X      |      |         |           |
| Bantu (S. Africa) | -25.6              | 24.3                | [45]                  | 8           | 0                         | Illumina 650K       | [31]               | X                                            |        | X      |      |         |           |
| Basque            | 43                 | 0                   | [45]                  | 24          | 0                         | Illumina 650K       | [31]               | X                                            |        |        |      |         |           |
| Bedouin           | 31                 | 35                  | [45]                  | 45          | 0                         | Illumina 650K       | [31]               | X                                            |        | X      |      |         |           |
| Biaka Pygmy       | 4                  | 17                  | [45]                  | 22          | 0                         | Illumina 650K       | [31]               | X                                            |        | X      |      |         |           |
| Brahui            | 30.5               | 66.5                | [45]                  | 25          | 0                         | Illumina 650K       | [31]               | X                                            |        | X      |      |         |           |
| Burusho           | 36.5               | 74                  | [45]                  | 25          | 0                         | Illumina 650K       | [31]               | X                                            |        | X      |      |         |           |
| Cambodian         | 12                 | 105                 | [45]                  | 10          | 0                         | Illumina 650K       | [31]               | X                                            |        | X      |      |         |           |
| Colombian         | 3                  | -68                 | [45]                  | 7           | 0                         | Illumina 650K       | [31]               | X                                            |        | X      |      |         |           |
| Dai               | 21                 | 100                 | [45]                  | 10          | 0                         | Illumina 650K       | [31]               | X                                            |        | X      |      |         |           |
| Daur              | 48.5               | 124                 | [45]                  | 9           | 0                         | Illumina 650K       | [31]               | X                                            |        | X      |      |         |           |
| Druze             | 32                 | 35                  | [45]                  | 42          | 0                         | Illumina 650K       | [31]               | X                                            |        | X      |      |         |           |
| French            | 46                 | 2                   | [45]                  | 28          | 0                         | Illumina 650K       | [31]               | X                                            |        | X      |      |         |           |
| Han               | 32.3               | 114                 | [45]                  | 34          | 0                         | Illumina 650K       | [31]               | X                                            |        | X      |      |         |           |
| Han (N. China)    | 32.3               | 114                 | [45]                  | 10          | 0                         | Illumina 650K       | [31]               | X                                            |        | X      |      |         | X         |
| Hazara            | 33.5               | 70                  | [45]                  | 22          | 0                         | Illumina 650K       | [31]               | X                                            |        | X      |      |         |           |
| Hezhen            | 47.5               | 133.5               | [45]                  | 9           | 0                         | Illumina 650K       | [31]               | X                                            |        | X      |      |         |           |
| Italian           | 46                 | 10                  | [45]                  | 12          | 0                         | Illumina 650K       | [31]               | X                                            |        | X      |      |         |           |
| Japanese          | 38                 | 138                 | [45]                  | 28          | 0                         | Illumina 650K       | [31]               | X                                            |        | X      |      |         |           |
| Kalash            | 36.0               | 71.5                | [45]                  | 23          | 0                         | Illumina 650K       | [31]               | X                                            |        | X      |      |         | X         |
| Karitiana         | -10                | -63                 | [45]                  | 13          | 0                         | Illumina 650K       | [31]               | X                                            |        | X      |      |         |           |
| Lahu              | 22                 | 100                 | [45]                  | 8           | 0                         | Illumina 650K       | [31]               | X                                            |        | X      |      |         |           |
| Makrani           | 26                 | 64                  | [45]                  | 25          | 0                         | Illumina 650K       | [31]               | X                                            |        | X      |      |         | X         |
| Mandenka          | 12                 | -12                 | [45]                  | 22          | 0                         | Illumina 650K       | [31]               | X                                            |        | X      |      |         |           |
| Maya              | 19                 | -91                 | [45]                  | 21          | 0                         | Illumina 650K       | [31]               | X                                            |        | X      |      |         |           |
| Mbuti Pygmy       | 1                  | 29                  | [45]                  | 13          | 0                         | Illumina 650K       | [31]               | X                                            |        | X      |      |         |           |
| Melanesian        | -6                 | 155                 | [45]                  | 11          | 0                         | Illumina 650K       | [31]               | X                                            |        | X      |      |         |           |
| Miao              | 28                 | 109                 | [45]                  | 10          | 0                         | Illumina 650K       | [31]               | X                                            |        | X      |      |         | X         |
| Mongola           | 45                 | 111                 | [45]                  | 10          | 0                         | Illumina 650K       | [31]               | X                                            |        | X      |      |         | X         |
| Mozabite          | 32                 | 3                   | [45]                  | 27          | 0                         | Illumina 650K       | [31]               | X                                            |        | X      |      |         |           |
| Naxi              | 26                 | 100                 | [45]                  | 8           | 0                         | Illumina 650K       | [31]               | X                                            |        | X      |      |         | X         |
| Ocadian           | 59                 | -3                  | [45]                  | 15          | 0                         | Illumina 650K       | [31]               | X                                            |        | X      |      |         | X         |
| Oroqen            | 50.4               | 126.5               | [45]                  | 9           | 0                         | Illumina 650K       | [31]               | X                                            |        | X      |      |         | X         |
| Palestinian       | 32                 | 35                  | [45]                  | 46          | 0                         | Illumina 650K       | [31]               | X                                            |        | X      |      |         | X         |
| Papuan            | -4                 | 143                 | [45]                  | 17          | 0                         | Illumina 650K       | [31]               | X                                            |        | X      |      |         |           |
| Pathan            | 33.5               | 70.5                | [45]                  | 22          | 0                         | Illumina 650K       | [31]               | X                                            |        | X      |      |         | X         |
| Pima              | 29                 | -108                | [45]                  | 14          | 0                         | Illumina 650K       | [31]               | X                                            |        | X      |      |         |           |
| Russian           | 61                 | 40                  | [45]                  | 25          | 0                         | Illumina 650K       | [31]               | X                                            |        | X      |      |         |           |
| San               | -21                | 20                  | [45]                  | 5           | 0                         | Illumina 650K       | [31]               | X                                            |        | X      |      |         |           |
| Sardinian         | 40                 | 9                   | [45]                  | 28          | 0                         | Illumina 650K       | [31]               | X                                            |        | X      |      |         | X         |
| She               | 27                 | 119                 | [45]                  | 10          | 0                         | Illumina 650K       | [31]               | X                                            |        | X      |      |         | X         |
| Sindhi            | 25.5               | 69                  | [45]                  | 24          | 0                         | Illumina 650K       | [31]               | X                                            |        | X      |      |         | X         |
| Surui             | -11                | -62                 | [45]                  | 8           | 0                         | Illumina 650K       | [31]               | X                                            |        | X      |      |         | X         |

Table S1: Populations included in this study (Part I).
