# Supplementary material for: A Quantitative Comparison of the Similarity between Genes and Geography in Worldwide Human Populations
Source: PubMed Central journal article supplement (PMC3426559; doi:10.1371/journal.pgen.1002886), 2012-08-23
Supplement: pgen.1002886.s011.pdf [file pgen.1002886.s011.pdf]

| Population              | Latitude (degrees) | Longitude (degrees) | Source of coordinates | Sample size | High-missing-data samples | Genotyping platform | Source of SNP data | Datasets in which the population is included |        |        |      |         |           |
|-------------------------|--------------------|---------------------|-----------------------|-------------|---------------------------|---------------------|--------------------|----------------------------------------------|--------|--------|------|---------|-----------|
|                         |                    |                     |                       |             |                           |                     |                    | World                                        | Europe | Africa | Asia | E. Asia | C.S. Asia |
| Tu                      | 36                 | 101                 | [45]                  | 10          | 0                         | Illumina 650K       | [31]               | X                                            |        |        | X    | X       |           |
| Tujia                   | 29                 | 109                 | [45]                  | 10          | 0                         | Illumina 650K       | [31]               | X                                            |        |        | X    | X       |           |
| Tuscan                  | 43                 | 11                  | [45]                  | 7           | 0                         | Illumina 650K       | [31]               | X                                            |        |        |      |         |           |
| Uyghur                  | 44                 | 81                  | [45]                  | 10          | 0                         | Illumina 650K       | [31]               | X                                            |        |        | X    |         |           |
| Xibo                    | 43.5               | 81.5                | [45]                  | 9           | 0                         | Illumina 650K       | [31]               | X                                            |        |        | X    | X       | X         |
| Yakut                   | 63.0               | 129.5               | [45]                  | 25          | 0                         | Illumina 650K       | [31]               | X                                            |        |        | X    | X       |           |
| Yi                      | 28                 | 103                 | [45]                  | 10          | 0                         | Illumina 650K       | [31]               | X                                            |        |        | X    | X       |           |
| Yoruba                  | 8                  | 5                   | [45]                  | 21          | 0                         | Illumina 650K       | [31]               | X                                            |        | X      |      |         |           |
| Luhya (LWK)             | 0.6                | 34.8                | [33]                  | 30          | 0                         | HapMap3 rel2        | [31]               |                                              |        | X      |      |         |           |
| Maasai (MKK)            | 0                  | 37.9                | [33]                  | 30          | 0                         | HapMap3 rel2        | [31]               |                                              |        | X      |      |         |           |
| Albania (AL)            | 41.2               | 20.1                | [9]                   | 3           | 0                         | Affymetrix 500K     | [9]                |                                              | X      |        |      |         |           |
| Austria (AT)            | 47.6               | 14.1                | [9]                   | 14          | 0                         | Affymetrix 500K     | [9]                |                                              | X      |        |      |         |           |
| Bosnia-Herzegovina (BA) | 44.2               | 17.9                | [9]                   | 9           | 0                         | Affymetrix 500K     | [9]                |                                              | X      |        |      |         |           |
| Belgium (BE)            | 50.7               | 4.61                | [9]                   | 43          | 1                         | Affymetrix 500K     | [9]                |                                              | X      |        |      |         |           |
| Bulgaria (BG)           | 42.8               | 25.2                | [9]                   | 2           | 0                         | Affymetrix 500K     | [9]                |                                              | X      |        |      |         |           |
| Swiss-French (CH-F)     | 46.2               | 6.15                | [9]                   | 125         | 0                         | Affymetrix 500K     | [9]                |                                              | X      |        |      |         |           |
| Swiss-German (CH-G)     | 47.4               | 8.55                | [9]                   | 84          | 2                         | Affymetrix 500K     | [9]                |                                              | X      |        |      |         |           |
| Swiss-Italian (CH-I)    | 46                 | 8.95                | [9]                   | 13          | 0                         | Affymetrix 500K     | [9]                |                                              | X      |        |      |         |           |
| Cyprus (CY)             | 35.1               | 33.2                | [9]                   | 4           | 0                         | Affymetrix 500K     | [9]                |                                              | X      |        |      |         |           |
| Czech Republic (CZ)     | 49.7               | 15.4                | [9]                   | 11          | 0                         | Affymetrix 500K     | [9]                |                                              | X      |        |      |         |           |
| Germany (DE)            | 51.1               | 10.4                | [9]                   | 71          | 2                         | Affymetrix 500K     | [9]                |                                              | X      |        |      |         |           |
| Denmark (DK)            | 56.1               | 9.25                | [9]                   | 1           | 0                         | Affymetrix 500K     | [9]                |                                              | X      |        |      |         |           |
| Spain (ES)              | 40.3               | -3.57               | [9]                   | 136         | 0                         | Affymetrix 500K     | [9]                |                                              | X      |        |      |         |           |
| Finland (FI)            | 60.2               | 24.9                | [9]                   | 1           | 0                         | Affymetrix 500K     | [9]                |                                              | X      |        |      |         |           |
| France (FR)             | 46.6               | 2.39                | [9]                   | 89          | 0                         | Affymetrix 500K     | [9]                |                                              | X      |        |      |         |           |
| United Kingdom (GB)     | 53.5               | -2.33               | [9]                   | 200         | 1                         | Affymetrix 500K     | [9]                |                                              | X      |        |      |         |           |
| Greece (GR)             | 40                 | 22.7                | [9]                   | 8           | 0                         | Affymetrix 500K     | [9]                |                                              | X      |        |      |         |           |
| Croatia (HR)            | 45.3               | 16.1                | [9]                   | 8           | 0                         | Affymetrix 500K     | [9]                |                                              | X      |        |      |         |           |
| Hungary (HU)            | 47.2               | 19.4                | [9]                   | 19          | 0                         | Affymetrix 500K     | [9]                |                                              | X      |        |      |         |           |
| Ireland (IE)            | 53.2               | -8.18               | [9]                   | 61          | 1                         | Affymetrix 500K     | [9]                |                                              | X      |        |      |         |           |
| Italy (IT)              | 42                 | 12.5                | [9]                   | 219         | 0                         | Affymetrix 500K     | [9]                |                                              | X      |        |      |         |           |
| Kosovo (KS)             | 42.7               | 21.1                | [9]                   | 2           | 0                         | Affymetrix 500K     | [9]                |                                              | X      |        |      |         |           |
| Latvia (LV)             | 56.9               | 24.9                | [9]                   | 1           | 0                         | Affymetrix 500K     | [9]                |                                              | X      |        |      |         |           |
| Macedonia (MK)          | 41.7               | 21.7                | [9]                   | 4           | 0                         | Affymetrix 500K     | [9]                |                                              | X      |        |      |         |           |
| Netherlands (NL)        | 52.3               | 5.67                | [9]                   | 17          | 0                         | Affymetrix 500K     | [9]                |                                              | X      |        |      |         |           |
| Norway (NO)             | 59.9               | 10.7                | [9]                   | 3           | 0                         | Affymetrix 500K     | [9]                |                                              | X      |        |      |         |           |
| Poland (PL)             | 52.1               | 19.4                | [9]                   | 22          | 0                         | Affymetrix 500K     | [9]                |                                              | X      |        |      |         |           |
| Portugal (PT)           | 39.6               | -8.02               | [9]                   | 128         | 0                         | Affymetrix 500K     | [9]                |                                              | X      |        |      |         |           |
| Romania (RO)            | 45.9               | 25                  | [9]                   | 14          | 0                         | Affymetrix 500K     | [9]                |                                              | X      |        |      |         |           |
| Russia (RU)             | 55.8               | 37.5                | [9]                   | 6           | 0                         | Affymetrix 500K     | [9]                |                                              | X      |        |      |         |           |
| Scotland (Sct)          | 56                 | -3.2                | [9]                   | 5           | 0                         | Affymetrix 500K     | [9]                |                                              | X      |        |      |         |           |
| Sweden (SE)             | 59.4               | 18                  | [9]                   | 10          | 0                         | Affymetrix 500K     | [9]                |                                              | X      |        |      |         |           |
| Slovenia (SI)           | 46.1               | 14.8                | [9]                   | 2           | 0                         | Affymetrix 500K     | [9]                |                                              | X      |        |      |         |           |
| Slovakia (SK)           | 48.7               | 19.5                | [9]                   | 1           | 0                         | Affymetrix 500K     | [9]                |                                              | X      |        |      |         |           |
| Turkey (TR)             | 39.1               | 35.4                | [9]                   | 4           | 0                         | Affymetrix 500K     | [9]                |                                              | X      |        |      |         |           |

Table S2: Populations included in this study (Part II).
