# Supplementary material for: A Quantitative Comparison of the Similarity between Genes and Geography in Worldwide Human Populations
Source: PubMed Central journal article supplement (PMC3426559; doi:10.1371/journal.pgen.1002886), 2012-08-23
Supplement: pgen.1002886.s012.pdf [file pgen.1002886.s012.pdf]

| Population             | Latitude (degrees) | Longitude (degrees) | Source of coordinates | Sample size | High-missing-data samples | Genotyping platform  | Source of SNP data | Datasets in which the population is included |        |        |      |         |           |
|------------------------|--------------------|---------------------|-----------------------|-------------|---------------------------|----------------------|--------------------|----------------------------------------------|--------|--------|------|---------|-----------|
|                        |                    |                     |                       |             |                           |                      |                    | World                                        | Europe | Africa | Asia | E. Asia | C.S. Asia |
| Ukraine (UA)           | 49.1               | 31.4                | [9]                   | 1           | 0                         | Affymetrix 500K      | [9]                |                                              | X      |        |      |         |           |
| Serbia-Montenegro (YG) | 43.9               | 20.6                | [9]                   | 44          | 0                         | Affymetrix 500K      | [9]                |                                              | X      |        |      |         |           |
| Bamoun                 | 5.5                | 10.8                | [37]                  | 20          | 2                         | Affymetrix 500K      | [26]               |                                              |        | X      |      |         |           |
| Brong                  | 7.5                | -2.0                | [37]                  | 8           | 1                         | Affymetrix 500K      | [26]               |                                              |        | X      |      |         |           |
| Bulala                 | 13.0               | 18.0                | [37]                  | 15          | 0                         | Affymetrix 500K      | [26]               |                                              |        | X      |      |         |           |
| Fang                   | 2.5                | 13.0                | [37]                  | 18          | 1                         | Affymetrix 500K      | [26]               |                                              |        | X      |      |         |           |
| Hausa                  | 12.0               | 8.0                 | [37]                  | 13          | 2                         | Affymetrix 500K      | [26]               |                                              |        | X      |      |         |           |
| Igbo                   | 6.0                | 7.0                 | [37]                  | 17          | 4                         | Affymetrix 500K      | [26]               |                                              |        | X      |      |         |           |
| Kaba                   | 8.0                | 16.8                | [37]                  | 16          | 0                         | Affymetrix 500K      | [26]               |                                              |        | X      |      |         |           |
| Kongo                  | -5.5               | 15.0                | [37]                  | 9           | 0                         | Affymetrix 500K      | [26]               |                                              |        | X      |      |         |           |
| Mbororo Fulani         | 11.8               | 14.8                | [37]                  | 13          | 2                         | Affymetrix 500K      | [26]               |                                              |        | X      |      |         |           |
| Mada                   | 10.8               | 14.1                | [37]                  | 12          | 0                         | Affymetrix 500K      | [26]               |                                              |        | X      |      |         |           |
| Xhosa                  | -32.0              | 28.0                | [37]                  | 5           | 2                         | Affymetrix 500K      | [26]               |                                              |        | X      |      |         |           |
| !Kung                  | -19.6              | 20.5                | J. Xing               | 13          | 0                         | Affymetrix Nspl 250K | [23]               |                                              |        | X      |      |         |           |
| Alur                   | -3.0               | 30.9                | J. Xing               | 10          | 0                         | Affymetrix Nspl 250K | [23]               |                                              |        | X      |      |         | X         |
| A.P. Brahmin           | 17.7               | 83.3                | J. Xing               | 25          | 0                         | Affymetrix Nspl 250K | [23]               |                                              |        | X      |      |         | X         |
| A.P. Madiga            | 17.7               | 83.3                | J. Xing               | 10          | 0                         | Affymetrix Nspl 250K | [23]               |                                              |        | X      |      |         | X         |
| A.P. Mala              | 17.7               | 83.3                | J. Xing               | 11          | 0                         | Affymetrix Nspl 250K | [23]               |                                              |        | X      |      |         | X         |
| Bambaran               | 12.5               | -8.0                | J. Xing               | 25          | 0                         | Affymetrix 6.0       | [23]               |                                              |        | X      |      |         |           |
| Buryat                 | 48.1               | 114.6               | J. Xing               | 25          | 0                         | Affymetrix 6.0       | [23]               |                                              |        | X      |      |         | X         |
| Dogon                  | 15.1               | -4.2                | J. Xing               | 24          | 0                         | Affymetrix 6.0       | [23]               |                                              |        | X      |      |         |           |
| Hema                   | 1.6                | 30.3                | J. Xing               | 15          | 0                         | Affymetrix Nspl 250K | [23]               |                                              |        | X      |      |         |           |
| Iban                   | 3.1                | 113.0               | J. Xing               | 25          | 0                         | Affymetrix Nspl 250K | [23]               |                                              |        | X      |      |         | X         |
| Iraqi Kurd             | 36.7               | 43.9                | J. Xing               | 24          | 0                         | Affymetrix 6.0       | [23]               |                                              |        | X      |      |         |           |
| Irula                  | 13.1               | 80.3                | J. Xing               | 24          | 0                         | Affymetrix Nspl 250K | [23]               |                                              |        | X      |      |         | X         |
| Kyrgyzstani            | 43.2               | 74.6                | J. Xing               | 25          | 0                         | Affymetrix 6.0       | [23]               |                                              |        | X      |      |         | X         |
| Nepalese               | 27.7               | 85.3                | J. Xing               | 25          | 0                         | Affymetrix 6.0       | [23]               |                                              |        | X      |      |         | X         |
| Nguni                  | -33.3              | 26.5                | J. Xing               | 9           | 0                         | Affymetrix Nspl 250K | [23]               |                                              |        | X      |      |         |           |
| Pakistani              | 28.6               | 70.3                | J. Xing               | 25          | 0                         | Affymetrix 6.0       | [23]               |                                              |        | X      |      |         | X         |
| Pedi                   | -25.5              | 26.1                | J. Xing               | 10          | 0                         | Affymetrix Nspl 250K | [23]               |                                              |        | X      |      |         |           |
| Sotho/Tswana           | -26.2              | 28.1                | J. Xing               | 8           | 0                         | Affymetrix Nspl 250K | [23]               |                                              |        | X      |      |         | X         |
| Stalskoe               | 43.0               | 47.5                | J. Xing               | 5           | 0                         | Affymetrix Nspl 250K | [23]               |                                              |        | X      |      |         |           |
| Thai                   | 7.9                | 98.3                | J. Xing               | 24          | 0                         | Affymetrix 6.0       | [23]               |                                              |        | X      |      |         | X         |
| T.N. Brahmin           | 13.1               | 80.3                | J. Xing               | 14          | 0                         | Affymetrix Nspl 250K | [23]               |                                              |        | X      |      |         | X         |
| T.N. Dalit             | 13.1               | 80.3                | J. Xing               | 13          | 0                         | Affymetrix 6.0       | [23]               |                                              |        | X      |      |         | X         |
| Urkarah                | 43.0               | 47.5                | J. Xing               | 18          | 0                         | Affymetrix Nspl 250K | [23]               |                                              |        | X      |      |         | X         |
| Vietnamese             | 16.7               | 107.3               | J. Xing               | 7           | 0                         | Affymetrix Nspl 250K | [23]               |                                              |        | X      |      |         | X         |
| Tibetan                | 34.9               | 98.2                | [32]                  | 31          | 0                         | Affymetrix 6.0       | [32]               |                                              |        | X      |      |         | X         |

Table S3: Populations included in this study (Part III).
