# Supplementary material for: A Quantitative Comparison of the Similarity between Genes and Geography in Worldwide Human Populations
Source: PubMed Central journal article supplement (PMC3426559; doi:10.1371/journal.pgen.1002886), 2012-08-23
Supplement: pgen.1002886.s014.pdf [file pgen.1002886.s014.pdf]

| Population excluded     | Number of individuals excluded | Similarity to original PCA $t'$ | Similarity to geography $t''$ | $t'' - t_0$ |
|-------------------------|--------------------------------|---------------------------------|-------------------------------|-------------|
| Italy (IT)              | 219                            | 0.986                           | 0.810                         | 0.030       |
| Russia (RU)             | 6                              | 1.000                           | 0.788                         | 0.008       |
| Swiss-French (CH-F)     | 125                            | 1.000                           | 0.785                         | 0.005       |
| Swiss-German (CH-G)     | 84                             | 1.000                           | 0.785                         | 0.005       |
| Germany (DE)            | 69                             | 1.000                           | 0.783                         | 0.003       |
| France (FR)             | 89                             | 1.000                           | 0.783                         | 0.003       |
| Sweden (SE)             | 10                             | 1.000                           | 0.782                         | 0.002       |
| Swiss-Italian (CH-I)    | 13                             | 1.000                           | 0.781                         | 0.001       |
| Austria (AT)            | 14                             | 1.000                           | 0.781                         | 0.001       |
| Slovakia (SK)           | 1                              | 1.000                           | 0.780                         | 0.000       |
| Hungary (HU)            | 19                             | 1.000                           | 0.780                         | 0.000       |
| Romania (RO)            | 14                             | 1.000                           | 0.780                         | 0.000       |
| Finland (FI)            | 1                              | 1.000                           | 0.780                         | 0.000       |
| Ukraine (UA)            | 1                              | 1.000                           | 0.780                         | 0.000       |
| Bulgaria (BG)           | 2                              | 1.000                           | 0.780                         | 0.000       |
| Slovenia (SI)           | 2                              | 1.000                           | 0.779                         | -0.001      |
| Denmark (DK)            | 1                              | 1.000                           | 0.779                         | -0.001      |
| Latvia (LV)             | 1                              | 1.000                           | 0.779                         | -0.001      |
| Norway (NO)             | 3                              | 1.000                           | 0.779                         | -0.001      |
| Poland (PL)             | 22                             | 0.999                           | 0.779                         | -0.001      |
| Turkey (TR)             | 4                              | 1.000                           | 0.779                         | -0.001      |
| Croatia (HR)            | 8                              | 1.000                           | 0.779                         | -0.001      |
| Kosovo (KS)             | 2                              | 1.000                           | 0.779                         | -0.001      |
| Belgium (BE)            | 42                             | 1.000                           | 0.779                         | -0.001      |
| Czech Republic (CZ)     | 11                             | 1.000                           | 0.779                         | -0.001      |
| Cyprus (CY)             | 4                              | 1.000                           | 0.779                         | -0.001      |
| Scotland (Sct)          | 5                              | 1.000                           | 0.779                         | -0.001      |
| Netherlands (NL)        | 17                             | 1.000                           | 0.779                         | -0.001      |
| Macedonia (MK)          | 4                              | 1.000                           | 0.779                         | -0.001      |
| Albania (AL)            | 3                              | 1.000                           | 0.779                         | -0.001      |
| Bosnia-Herzegovina (BA) | 9                              | 1.000                           | 0.779                         | -0.001      |
| Greece (GR)             | 8                              | 1.000                           | 0.778                         | -0.002      |
| Ireland (IE)            | 60                             | 0.999                           | 0.776                         | -0.004      |
| Serbia-Montenegro (YG)  | 44                             | 0.998                           | 0.772                         | -0.008      |
| Spain (ES)              | 136                            | 0.994                           | 0.770                         | -0.010      |
| Portugal (PT)           | 126                            | 0.990                           | 0.769                         | -0.011      |
| United Kingdom (GB)     | 199                            | 0.998                           | 0.764                         | -0.016      |

Table S5: Change of the Procrustes similarity when excluding one population from the European example. The Procrustes similarity between genetic coordinates and geographic coordinates is  $t_0 = 0.780$  in the original analysis (Fig. 2).
