# Supplementary material for: A Quantitative Comparison of the Similarity between Genes and Geography in Worldwide Human Populations
Source: PubMed Central journal article supplement (PMC3426559; doi:10.1371/journal.pgen.1002886), 2012-08-23
Supplement: pgen.1002886.s015.pdf [file pgen.1002886.s015.pdf]

| Population excluded | Number of individuals excluded | Similarity to original PCA $t'$ | Similarity to geography $t''$ | $t'' - t_0$ |
|---------------------|--------------------------------|---------------------------------|-------------------------------|-------------|
| Maasai (MKK)        | 30                             | 0.980                           | 0.832                         | 0.042       |
| Luhya (LWK)         | 30                             | 0.999                           | 0.808                         | 0.018       |
| Bamoun              | 18                             | 1.000                           | 0.797                         | 0.007       |
| Bantu (Kenya)       | 11                             | 1.000                           | 0.797                         | 0.007       |
| Fang                | 17                             | 1.000                           | 0.796                         | 0.006       |
| Mandenka            | 22                             | 0.999                           | 0.795                         | 0.005       |
| Kaba                | 16                             | 1.000                           | 0.794                         | 0.004       |
| Hausa               | 13                             | 1.000                           | 0.794                         | 0.004       |
| Igbo                | 17                             | 1.000                           | 0.791                         | 0.001       |
| Kongo               | 9                              | 1.000                           | 0.791                         | 0.001       |
| Yoruba              | 21                             | 1.000                           | 0.791                         | 0.001       |
| Alur                | 10                             | 1.000                           | 0.789                         | -0.001      |
| Brong               | 7                              | 1.000                           | 0.788                         | -0.002      |
| Dogon               | 24                             | 0.995                           | 0.788                         | -0.002      |
| Bambaran            | 25                             | 0.999                           | 0.786                         | -0.004      |
| Mada                | 12                             | 1.000                           | 0.785                         | -0.005      |
| Hema                | 13                             | 1.000                           | 0.784                         | -0.006      |
| Xhosa               | 3                              | 1.000                           | 0.783                         | -0.007      |
| Bantu (S. Africa)   | 8                              | 0.999                           | 0.781                         | -0.009      |
| Bulala              | 15                             | 0.999                           | 0.780                         | -0.010      |
| Pedi                | 10                             | 0.998                           | 0.775                         | -0.015      |
| Nguni               | 9                              | 0.998                           | 0.774                         | -0.016      |
| Sotho/Tswana        | 8                              | 0.997                           | 0.768                         | -0.022      |

Table S6: Change of the Procrustes similarity when excluding one population from the Sub-Saharan African example. The Procrustes similarity between genetic coordinates and geographic coordinates is  $t_0 = 0.790$  in the original analysis (Fig. 3).
