# Supplementary material for: A Quantitative Comparison of the Similarity between Genes and Geography in Worldwide Human Populations
Source: PubMed Central journal article supplement (PMC3426559; doi:10.1371/journal.pgen.1002886), 2012-08-23
Supplement: pgen.1002886.s017.pdf [file pgen.1002886.s017.pdf]

| Population excluded | Number of individuals excluded | Similarity to original PCA $t'$ | Similarity to geography $t''$ | $t'' - t_0$ |
|---------------------|--------------------------------|---------------------------------|-------------------------------|-------------|
| Irula               | 24                             | 0.993                           | 0.871                         | 0.022       |
| Xibo                | 9                              | 1.000                           | 0.857                         | 0.008       |
| Tibetan             | 31                             | 1.000                           | 0.854                         | 0.005       |
| Kyrgyzstani         | 25                             | 1.000                           | 0.854                         | 0.005       |
| A.P. Brahmin        | 25                             | 1.000                           | 0.854                         | 0.005       |
| Nepalese            | 25                             | 1.000                           | 0.853                         | 0.004       |
| Yakut               | 25                             | 0.999                           | 0.853                         | 0.004       |
| T.N. Dalit          | 13                             | 1.000                           | 0.853                         | 0.004       |
| A.P. Mala           | 11                             | 1.000                           | 0.852                         | 0.003       |
| Hazara              | 22                             | 1.000                           | 0.852                         | 0.003       |
| A.P. Madiga         | 10                             | 1.000                           | 0.852                         | 0.003       |
| Naxi                | 8                              | 1.000                           | 0.852                         | 0.003       |
| T.N. Brahmin        | 14                             | 1.000                           | 0.851                         | 0.002       |
| Lahu                | 8                              | 1.000                           | 0.851                         | 0.002       |
| Yi                  | 10                             | 1.000                           | 0.851                         | 0.002       |
| Dai                 | 10                             | 1.000                           | 0.850                         | 0.001       |
| Tu                  | 10                             | 1.000                           | 0.850                         | 0.001       |
| Thai                | 24                             | 1.000                           | 0.850                         | 0.001       |
| Uygur               | 10                             | 1.000                           | 0.849                         | 0.000       |
| Vietnamese          | 7                              | 1.000                           | 0.849                         | 0.000       |
| Tujia               | 10                             | 1.000                           | 0.849                         | 0.000       |
| Miao                | 10                             | 1.000                           | 0.849                         | 0.000       |
| Kalash              | 23                             | 1.000                           | 0.849                         | 0.000       |
| Stalskoe            | 5                              | 1.000                           | 0.849                         | 0.000       |
| Burusho             | 25                             | 1.000                           | 0.848                         | -0.001      |
| Han (N. China)      | 10                             | 1.000                           | 0.848                         | -0.001      |
| Iban                | 25                             | 0.999                           | 0.848                         | -0.001      |
| Cambodian           | 10                             | 1.000                           | 0.848                         | -0.001      |
| Pathan              | 22                             | 1.000                           | 0.847                         | -0.002      |
| Hezhen              | 9                              | 1.000                           | 0.847                         | -0.002      |
| She                 | 10                             | 1.000                           | 0.847                         | -0.002      |
| Mongola             | 10                             | 1.000                           | 0.847                         | -0.002      |
| Makrani             | 20                             | 1.000                           | 0.847                         | -0.002      |
| Balochi             | 22                             | 1.000                           | 0.847                         | -0.002      |
| Japanese            | 28                             | 1.000                           | 0.847                         | -0.002      |
| Brahui              | 23                             | 1.000                           | 0.847                         | -0.002      |
| Daur                | 9                              | 1.000                           | 0.846                         | -0.003      |
| Pakistani           | 25                             | 1.000                           | 0.846                         | -0.003      |
| Sindhi              | 22                             | 1.000                           | 0.846                         | -0.003      |
| Oroqen              | 9                              | 1.000                           | 0.846                         | -0.003      |
| Urkarah             | 18                             | 1.000                           | 0.845                         | -0.004      |
| Iraqi Kurd          | 24                             | 1.000                           | 0.845                         | -0.004      |
| Han                 | 34                             | 1.000                           | 0.844                         | -0.005      |
| Buryat              | 25                             | 1.000                           | 0.839                         | -0.010      |

Table S8: Change of the Procrustes similarity when excluding one population from the Asian example. The Procrustes similarity between genetic coordinates and geographic coordinates is  $t_0 = 0.849$  in the original analysis (Fig. 4).
