# Supplementary material for: A Quantitative Comparison of the Similarity between Genes and Geography in Worldwide Human Populations
Source: PubMed Central journal article supplement (PMC3426559; doi:10.1371/journal.pgen.1002886), 2012-08-23
Supplement: pgen.1002886.s018.pdf [file pgen.1002886.s018.pdf]

| Population excluded | Number of individuals excluded | Similarity to original PCA<br>$t'$ | Similarity to geography<br>$t''$ | $t'' - t_0$ |
|---------------------|--------------------------------|------------------------------------|----------------------------------|-------------|
| Japanese            | 28                             | 0.999                              | 0.755                            | 0.115       |
| Thai                | 20                             | 0.994                              | 0.691                            | 0.051       |
| Han                 | 34                             | 0.999                              | 0.673                            | 0.033       |
| Xibo                | 8                              | 1.000                              | 0.655                            | 0.015       |
| Tibetan             | 31                             | 0.996                              | 0.655                            | 0.015       |
| She                 | 10                             | 1.000                              | 0.654                            | 0.014       |
| Hezhen              | 9                              | 1.000                              | 0.645                            | 0.005       |
| Han (N. China)      | 10                             | 1.000                              | 0.645                            | 0.005       |
| Miao                | 10                             | 1.000                              | 0.642                            | 0.002       |
| Tujia               | 10                             | 1.000                              | 0.642                            | 0.002       |
| Mongola             | 10                             | 1.000                              | 0.640                            | 0.000       |
| Dai                 | 10                             | 1.000                              | 0.637                            | -0.003      |
| Vietnamese          | 7                              | 1.000                              | 0.637                            | -0.003      |
| Tu                  | 10                             | 1.000                              | 0.637                            | -0.003      |
| Lahu                | 8                              | 1.000                              | 0.636                            | -0.004      |
| Daur                | 9                              | 1.000                              | 0.636                            | -0.004      |
| Cambodian           | 10                             | 1.000                              | 0.635                            | -0.005      |
| Buryat              | 25                             | 0.999                              | 0.635                            | -0.005      |
| Naxi                | 8                              | 1.000                              | 0.634                            | -0.006      |
| Yi                  | 10                             | 1.000                              | 0.631                            | -0.009      |
| Oroqen              | 9                              | 1.000                              | 0.631                            | -0.009      |
| Yakut               | 23                             | 0.988                              | 0.577                            | -0.063      |
| Iban                | 25                             | 0.993                              | 0.561                            | -0.079      |

Table S9: Change of the Procrustes similarity when excluding one population from the East Asian example. The Procrustes similarity between genetic coordinates and geographic coordinates is  $t_0 = 0.640$  in the original analysis (Fig. 5).
