# Supplementary material for: A Quantitative Comparison of the Similarity between Genes and Geography in Worldwide Human Populations
Source: PubMed Central journal article supplement (PMC3426559; doi:10.1371/journal.pgen.1002886), 2012-08-23
Supplement: pgen.1002886.s019.pdf [file pgen.1002886.s019.pdf]

| Population excluded | Number of individuals excluded | Similarity to original PCA $t'$ | Similarity to geography $t''$ | $t'' - t_0$ |
|---------------------|--------------------------------|---------------------------------|-------------------------------|-------------|
| Hazara              | 22                             | 1.000                           | 0.769                         | 0.032       |
| Kalash              | 23                             | 1.000                           | 0.754                         | 0.017       |
| A.P. Brahmin        | 25                             | 1.000                           | 0.749                         | 0.012       |
| T.N. Brahmin        | 14                             | 1.000                           | 0.748                         | 0.011       |
| Nepalese            | 25                             | 1.000                           | 0.747                         | 0.010       |
| Burusho             | 25                             | 1.000                           | 0.747                         | 0.010       |
| Pathan              | 22                             | 1.000                           | 0.740                         | 0.003       |
| Pakistani           | 25                             | 1.000                           | 0.736                         | -0.001      |
| Sindhi              | 22                             | 1.000                           | 0.732                         | -0.005      |
| A.P. Madiga         | 10                             | 1.000                           | 0.724                         | -0.013      |
| Uygur               | 10                             | 1.000                           | 0.723                         | -0.014      |
| A.P. Mala           | 11                             | 1.000                           | 0.721                         | -0.016      |
| Kyrgyzstani         | 25                             | 0.992                           | 0.720                         | -0.017      |
| Balochi             | 23                             | 0.999                           | 0.720                         | -0.017      |
| T.N. Dalit          | 13                             | 0.999                           | 0.720                         | -0.017      |
| Brahui              | 23                             | 0.999                           | 0.718                         | -0.019      |
| Makrani             | 20                             | 0.999                           | 0.718                         | -0.019      |
| Irula               | 24                             | 0.979                           | 0.717                         | -0.020      |

Table S10: Change of the Procrustes similarity when excluding one population from the Central/South Asian example. The Procrustes similarity between genetic coordinates and geographic coordinates is  $t_0 = 0.737$  in the original analysis (Fig. 6).
