# Supplementary material for: A Quantitative Comparison of the Similarity between Genes and Geography in Worldwide Human Populations
Source: PubMed Central journal article supplement (PMC3426559; doi:10.1371/journal.pgen.1002886), 2012-08-23
Supplement: pgen.1002886.s020.pdf [file pgen.1002886.s020.pdf]

| Analysis | Region             | Number of PCA outliers | Sample ID of PCA outliers                                                                                                                   | Population                                                                                                        |
|----------|--------------------|------------------------|---------------------------------------------------------------------------------------------------------------------------------------------|-------------------------------------------------------------------------------------------------------------------|
| Fig. 1   | Worldwide          | 0                      | -                                                                                                                                           | -                                                                                                                 |
| Fig. 2   | Europe             | 2                      | POPR26466<br>POPR48136                                                                                                                      | Portugal (PT)<br>Portugal (PT)                                                                                    |
| Fig. 3   | Sub-Saharan Africa | 2                      | AFH7<br>AFH10                                                                                                                               | Hema<br>Hema                                                                                                      |
| Fig. 4   | Asia               | 11                     | HGDP00057<br>HGDP00060<br>HGDP00013<br>HGDP00029<br>HGDP00130<br>HGDP00139<br>HGDP00150<br>HGDP00154<br>HGDP00157<br>HGDP00173<br>HGDP00175 | Balochi<br>Balochi<br>Brahui<br>Brahui<br>Makrani<br>Makrani<br>Makrani<br>Makrani<br>Makrani<br>Sindhi<br>Sindhi |
| Fig. 5   | East Asia          | 7                      | F066579<br>F066599<br>F066607<br>F066612<br>HGDP01243<br>HGDP00949<br>HGDP00953                                                             | Thai<br>Thai<br>Thai<br>Thai<br>Xibo<br>Yakut<br>Yakut                                                            |
| Fig. 6   | Central/South Asia | 10                     | HGDP00057<br>HGDP00013<br>HGDP00029<br>HGDP00130<br>HGDP00150<br>HGDP00151<br>HGDP00154<br>HGDP00157<br>HGDP00173<br>HGDP00175              | Balochi<br>Brahui<br>Brahui<br>Makrani<br>Makrani<br>Makrani<br>Makrani<br>Makrani<br>Sindhi<br>Sindhi            |
| Fig. S3B | Sub-Saharan Africa | 4                      | AFH7<br>AFH10<br>NA21417<br>NA21596                                                                                                         | Hema<br>Hema<br>Maasai (MKK)<br>Maasai (MKK)                                                                      |
| Fig. S3C | Sub-Saharan Africa | 2                      | AFH7<br>AFH10                                                                                                                               | Hema<br>Hema                                                                                                      |
| Fig. S3D | Sub-Saharan Africa | 3                      | AFH7<br>AFH10<br>NA21417                                                                                                                    | Hema<br>Hema<br>Maasai (MKK)                                                                                      |
| Fig. S3E | Sub-Saharan Africa | 4                      | AFH7<br>AFH10<br>NA21417<br>NA21596                                                                                                         | Hema<br>Hema<br>Maasai (MKK)<br>Maasai (MKK)                                                                      |
| Fig. S3F | Sub-Saharan Africa | 2                      | NA21417<br>TSW25                                                                                                                            | Maasai (MKK)<br>Sotho/Tswana                                                                                      |
| Fig. S3G | Sub-Saharan Africa | 1                      | NA21417                                                                                                                                     | Maasai (MKK)                                                                                                      |

Table S11: Samples identified as PCA outliers in the analyses for different geographic regions. Note that AFH7 and AFH10, which appeared as PCA outliers in most of the Sub-Saharan African examples, are likely to be relatives based on allele-sharing analysis (results not shown).
