# Supplementary material for: A Quantitative Comparison of the Similarity between Genes and Geography in Worldwide Human Populations
Source: PLoS Genet. 2012 Aug 23;8(8):e1002886. doi: 10.1371/journal.pgen.1002886 (PMC3426559; doi:10.1371/journal.pgen.1002886)
Supplement: Table S7 — Summary of the results for Sub-Saharan Africa when all or one of five additional African populations are included (corresponding to Figure S3). (PDF) [file pgen.1002886.s016.pdf]

| Populations added | Panel in Fig. S3 | Number of populations | Number of individuals collected | Number of individuals in the analysis | Variance explained by PC1 (%) | Variance explained by PC2 (%) | Rotation angle $\theta$ ( $^{\circ}$ ) | Procrustes similarity $t_0$ | $P$ -value of $t_0$ | $F_{ST}$ (%) |
|-------------------|------------------|-----------------------|---------------------------------|---------------------------------------|-------------------------------|-------------------------------|----------------------------------------|-----------------------------|---------------------|--------------|
| All               | B                | 28                    | 422                             | 412                                   | 1.68                          | 1.21                          | -78.47                                 | 0.548                       | 0.00040             | 2.567        |
| Mbororo Fulani    | C                | 24                    | 369                             | 361                                   | 1.40                          | 0.84                          | 29.25                                  | 0.605                       | 0.00005             | 1.518        |
| Biaka Pygmy       | D                | 24                    | 378                             | 369                                   | 1.26                          | 1.03                          | 20.01                                  | 0.559                       | 0.00278             | 1.652        |
| Mbuti Pygmy       | E                | 24                    | 369                             | 359                                   | 1.27                          | 1.19                          | -10.05                                 | 0.543                       | 0.00120             | 1.781        |
| !Kung             | F                | 24                    | 369                             | 361                                   | 1.29                          | 1.04                          | 3.89                                   | 0.721                       | $< 10^{-5}$         | 1.616        |
| San               | G                | 24                    | 361                             | 354                                   | 1.31                          | 0.92                          | 5.66                                   | 0.725                       | $< 10^{-5}$         | 1.578        |

Table S7: Summary of the results for Sub-Saharan Africa when all or one of five additional African populations are included (corresponding to Fig. S3).  $\theta$  is the rotation angle for the PCA map that optimizes the Procrustes similarity with the geographic map, and it is measured in degrees counterclockwise.  $P$ -values are obtained from 100,000 permutations of population labels.
